# Supplementary material for: Inverse pH Gradient-Assay for Facile Characterization of Proton-Antiporters in Xenopus Oocytes
Source: MDPI journal article supplement (doi:10.3390/membranes14020039), 2024-02-01
Supplement: s1 [file s1]

## Supplementary Materials

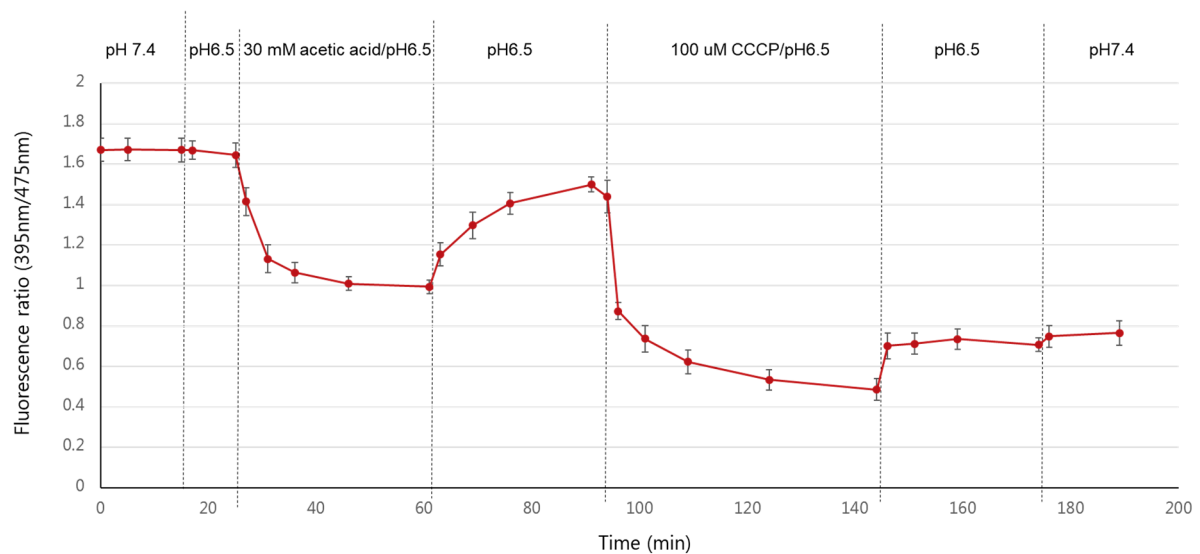

**Figure S1.** pHluorin2 ratio indicating cytosolic acidification by acetic acid or CCCP. pHluorin2 expressing oocytes. Intracellular acidification of *Xenopus* oocytes by 30 mM acetic acid followed by CCCP – buffers applied to the oocytes on top of the graph. The ratio between the emission at 395 and 475 nm (395/475 nm) represents the relative intracellular pH. Relative cytosolic pH is represented as mean (dot), error bars represent  $\pm$  s.d

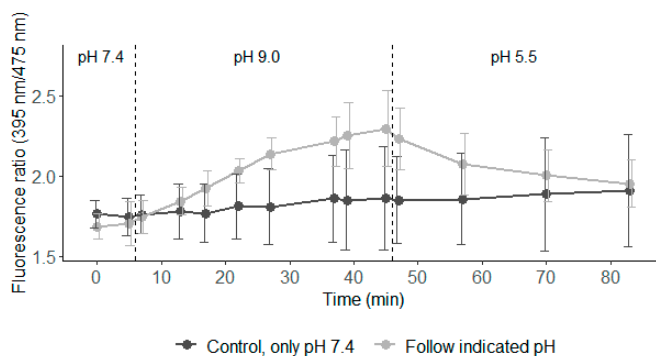

**Figure S2.** Intracellular alkalization of *Xenopus* oocytes by application of buffer with pH 9.0. pHluorin2 expressing oocytes. Dark grey line represent control oocytes that have had applied only buffer with pH 7.4, while light grey represent oocytes that have had buffers of the specified pH (7.4, 9.0, 5.5) applied. The ratio between the emission at 395 and 475 nm (395/475 nm) represents the relative intracellular pH. Relative cytosolic pH is represented as mean (dot), error bars represent  $\pm$  s.d. n = 4

**Table S1.** ANOVA table Figure 1, oocyte samples. Model: aov(Concentration\_coumaroylagmatine ~pH/RNA), data = subset\_oocyte\_samples

|           | Df | Sum sq | Mean sq | F value | Pr(>F)   |     |
|-----------|----|--------|---------|---------|----------|-----|
| pH        | 2  | 15436  | 7718    | 29.59   | 2.51E-08 | *** |
| pH:RNA    | 3  | 21120  | 7040    | 26.99   | 2.53E-09 | *** |
| Residuals | 36 | 9392   | 261     |         |          |     |

Signif. codes: 0 '\*\*\*' 0.001 '\*\*' 0.01 '\*' 0.05 '.' 0.1 ' ' 1

**Table S2.** ANOVA table Figure 1, buffer samples. Model: aov(Concentration\_coumaroylagmatine ~pH/RNA), data = subset\_buffer\_samples

|    | Df | Sum sq | Mean sq | F value | Pr(>F)   |     |
|----|----|--------|---------|---------|----------|-----|
| pH | 1  | 6099   | 6099    | 128.5   | 5.65E-12 | *** |

|           |    |       |      |       |         |     |
|-----------|----|-------|------|-------|---------|-----|
| pH:RNA    | 2  | 18746 | 9373 | 197.4 | < 2e-16 | *** |
| Residuals | 28 | 1329  | 47   |       |         |     |

Signif. codes: 0 '\*\*\*' 0.001 '\*\*' 0.01 '\*' 0.05 '.' 0.1 ' ' 1

**Table S3.** ANOVA table Figure 3b. Model: aov(Concentration\_coumaroylagmatine ~pH/RNA), data = all\_data\_import

|           | Df | Sum Sq | Mean Sq | F value | Pr(>F) |     |
|-----------|----|--------|---------|---------|--------|-----|
| pH        | 4  | 23808  | 5952    | 87.64   | <2e-16 | *** |
| pH:RNA    | 5  | 70221  | 14044   | 206.78  | <2e-16 | *** |
| Residuals | 58 | 3939   | 68      |         |        |     |

Signif. codes: 0 '\*\*\*' 0.001 '\*\*' 0.01 '\*' 0.05 '.' 0.1 ' ' 1
