# Supplementary material for: Inverse pH Gradient-Assay for Facile Characterization of Proton-Antiporters in Xenopus Oocytes
Source: Membranes (Basel). 2024 Feb 1;14(2):39. doi: 10.3390/membranes14020039 (PMC10889953; doi:10.3390/membranes14020039)
Supplement: Supplementary file 1 [file membranes-14-00039-s001.zip › Oocytes_raw data.xlsx]

## Sheet: Figure 1
No	Time	Sample.type	RNA	pH	Concentration_CouAgm
	T=0	Oocyte	DTX18	T=0	130.231
	T=0	Oocyte	DTX18	T=0	163.851
	T=0	Oocyte	DTX18	T=0	136.271
	T=0	Oocyte	DTX18	T=0	172.648
	T=0	Oocyte	DTX18	T=0	113.25
	T=0	Oocyte	Mock	T=0	181.686
	T=0	Oocyte	Mock	T=0	138.968
	T=0	Oocyte	Mock	T=0	110.471
	T=0	Oocyte	Mock	T=0	137.761
	T=0	Oocyte	Mock	T=0	109.818
1	T=150	Oocyte	DTX18	pH 5.0	53.9842
2	T=150	Oocyte	DTX18	pH 5.0	49.2106
3	T=150	Oocyte	DTX18	pH 5.0	50.2414
4	T=150	Oocyte	DTX18	pH 5.0	54.3444
5	T=150	Oocyte	DTX18	pH 5.0	53.4658
6	T=150	Oocyte	DTX18	pH 5.0	55.545
7	T=150	Oocyte	DTX18	pH 5.0	59.2679
8	T=150	Oocyte	DTX18	pH 5.0	56.5425
9	T=150	Oocyte	DTX18	pH 7.4	67.2785
10	T=150	Oocyte	DTX18	pH 7.4	97.8043
11	T=150	Oocyte	DTX18	pH 7.4	111.2
12	T=150	Oocyte	DTX18	pH 7.4	97.9185
13	T=150	Oocyte	DTX18	pH 7.4	109.756
14	T=150	Oocyte	DTX18	pH 7.4	103.297
15	T=150	Oocyte	DTX18	pH 7.4	97.1405
16	T=150	Oocyte	DTX18	pH 7.4	111.505
17	T=150	Oocyte	Mock	pH 5.0	126.751
18	T=150	Oocyte	Mock	pH 5.0	122.025
19	T=150	Oocyte	Mock	pH 5.0	117.01
20	T=150	Oocyte	Mock	pH 5.0	100.261
21	T=150	Oocyte	Mock	pH 5.0	152.929
22	T=150	Oocyte	Mock	pH 5.0	125.349
23	T=150	Oocyte	Mock	pH 5.0	122.211
24	T=150	Oocyte	Mock	pH 5.0	131.984
25	T=150	Oocyte	Mock	pH 7.4	117.975
26	T=150	Oocyte	Mock	pH 7.4	116.979
27	T=150	Oocyte	Mock	pH 7.4	121.152
28	T=150	Oocyte	Mock	pH 7.4	111.994
29	T=150	Oocyte	Mock	pH 7.4	122.38
30	T=150	Oocyte	Mock	pH 7.4	116.142
31	T=150	Oocyte	Mock	pH 7.4	95.5688
32	T=150	Oocyte	Mock	pH 7.4	117.804
25	T=150	Buffer	Mock	pH 7.4	2.7874
26	T=150	Buffer	Mock	pH 7.4	3.28315
27	T=150	Buffer	Mock	pH 7.4	1.9276
28	T=150	Buffer	Mock	pH 7.4	2.58858
29	T=150	Buffer	Mock	pH 7.4	0.765127
30	T=150	Buffer	Mock	pH 7.4	1.46728
31	T=150	Buffer	Mock	pH 7.4	2.04141
32	T=150	Buffer	Mock	pH 7.4	1.76513
17	T=150	Buffer	Mock	pH 5.0	2.51471
18	T=150	Buffer	Mock	pH 5.0	1.89927
19	T=150	Buffer	Mock	pH 5.0	1.28624
20	T=150	Buffer	Mock	pH 5.0	2.41635
21	T=150	Buffer	Mock	pH 5.0	2.64402
22	T=150	Buffer	Mock	pH 5.0	1.92907
23	T=150	Buffer	Mock	pH 5.0	1.82848
24	T=150	Buffer	Mock	pH 5.0	1.90647
9	T=150	Buffer	DTX18	pH 7.4	12.5285
10	T=150	Buffer	DTX18	pH 7.4	13.2008
11	T=150	Buffer	DTX18	pH 7.4	11.9208
12	T=150	Buffer	DTX18	pH 7.4	13.5008
13	T=150	Buffer	DTX18	pH 7.4	21.3819
14	T=150	Buffer	DTX18	pH 7.4	13.0573
15	T=150	Buffer	DTX18	pH 7.4	12.2673
16	T=150	Buffer	DTX18	pH 7.4	15.6087
1	T=150	Buffer	DTX18	pH 5.0	100.773
2	T=150	Buffer	DTX18	pH 5.0	66.4087
3	T=150	Buffer	DTX18	pH 5.0	57.8721
4	T=150	Buffer	DTX18	pH 5.0	61.2457
5	T=150	Buffer	DTX18	pH 5.0	69.9856
6	T=150	Buffer	DTX18	pH 5.0	63.6934
7	T=150	Buffer	DTX18	pH 5.0	71.2262
8	T=150	Buffer	DTX18	pH 5.0	64.2545

## Sheet: Figure 2a
Sample type	RNA	pH	Concentration_CouAgm
Oocyte	Mock	pH 5.0	0
Oocyte	Mock	pH 5.0	0
Oocyte	Mock	pH 5.0	0
Oocyte	Mock	pH 5.0	0
Oocyte	DTX18	pH 5.0	0
Oocyte	DTX18	pH 5.0	0
Oocyte	DTX18	pH 5.0	0
Oocyte	DTX18	pH 5.0	0
Oocyte	Mock	pH 9.0	0.427452
Oocyte	Mock	pH 9.0	0.242174
Oocyte	Mock	pH 9.0	0.220759
Oocyte	Mock	pH 9.0	0.538233
Oocyte	DTX18	pH 9.0	75.389
Oocyte	DTX18	pH 9.0	92.9922
Oocyte	DTX18	pH 9.0	141.314
Oocyte	DTX18	pH 9.0	91.2966

## Sheet: Figure 2b
Sample_type	RNA	Time	Concentration_CouAgm
Oocyte	DTX18	10	16.1609
Oocyte	DTX18	10	18.3711
Oocyte	DTX18	10	23.5772
Oocyte	DTX18	10	19.7568
Oocyte	DTX18	10	12.5766
Oocyte	DTX18	17	32.2527
Oocyte	DTX18	17	32.6735
Oocyte	DTX18	17	30.9487
Oocyte	DTX18	17	39.3434
Oocyte	DTX18	17	30.6263
Oocyte	DTX18	30	52.896
Oocyte	DTX18	30	48.906
Oocyte	DTX18	30	48.6405
Oocyte	DTX18	30	63.6492
Oocyte	DTX18	30	52.0911
Oocyte	DTX18	30	60.0846
Oocyte	DTX18	45	78.7082
Oocyte	DTX18	45	92.7247
Oocyte	DTX18	45	75.6581
Oocyte	DTX18	45	89.5536
Oocyte	DTX18	45	78.8192
Oocyte	DTX18	45	126.318
Oocyte	DTX18	60	91.3015
Oocyte	DTX18	60	107.561
Oocyte	DTX18	60	87.7634
Oocyte	DTX18	60	103.882
Oocyte	DTX18	60	91.4302
Oocyte	DTX18	60	138.95
Oocyte	DTX18	60	91.3015
Oocyte	DTX18	60	107.561
Oocyte	DTX18	120	166.02
Oocyte	DTX18	120	196.706
Oocyte	DTX18	120	169.264
Oocyte	DTX18	120	151.595
Oocyte	DTX18	120	141.189
Oocyte	DTX18	120	149.982
Oocyte	DTX18	180	219.635
Oocyte	DTX18	180	250.483
Oocyte	DTX18	180	237.636
Oocyte	DTX18	180	225.027
Oocyte	DTX18	180	176.407
Oocyte	DTX18	180	275.014
Oocyte	Mock	10	0
Oocyte	Mock	10	0
Oocyte	Mock	10	0
Oocyte	Mock	10	0
Oocyte	Mock	10	0
Oocyte	Mock	10	0
Oocyte	Mock	17	0
Oocyte	Mock	17	0
Oocyte	Mock	17	0
Oocyte	Mock	17	0
Oocyte	Mock	17	0
Oocyte	Mock	17	0
Oocyte	Mock	30	0
Oocyte	Mock	30	0
Oocyte	Mock	30	0
Oocyte	Mock	30	0
Oocyte	Mock	30	0
Oocyte	Mock	30	0
Oocyte	Mock	45	0
Oocyte	Mock	45	0
Oocyte	Mock	45	0
Oocyte	Mock	45	0
Oocyte	Mock	45	0
Oocyte	Mock	45	0
Oocyte	Mock	60	0
Oocyte	Mock	60	0
Oocyte	Mock	60	0
Oocyte	Mock	60	0
Oocyte	Mock	60	0
Oocyte	Mock	60	0
Oocyte	Mock	120	0.136565
Oocyte	Mock	120	0.168118
Oocyte	Mock	120	0.163283
Oocyte	Mock	120	0.301585
Oocyte	Mock	120	0.10491
Oocyte	Mock	120	0
Oocyte	Mock	120	0
Oocyte	Mock	120	0.271341
Oocyte	Mock	180	0.308082
Oocyte	Mock	180	0.155602
Oocyte	Mock	180	0
Oocyte	Mock	180	0.2001
Oocyte	Mock	180	0
Oocyte	Mock	180	0.164945
Oocyte	Mock	180	0.261218
Oocyte	Mock	180	0.132435

## Sheet: Figure 3a
RNA	Ratio	time	pH
pHluorine	2.18693	0	pH 7.4
pHluorine	1.9456	0	pH 7.4
pHluorine	1.9984	0	pH 7.4
pHluorine	1.95337	0	pH 7.4
pHluorine	1.85982	0	pH 7.4
pHluorine	2.17786	0	pH 7.4
pHluorine	1.75119	0	pH 7.4
pHluorine	1.81704	0	pH 7.4
DTX18+pHluorine	2.03965	0	pH 7.4
DTX18+pHluorine	2.06339	0	pH 7.4
DTX18+pHluorine	2.20438	0	pH 7.4
DTX18+pHluorine	1.94177	0	pH 7.4
DTX18+pHluorine	1.94853	0	pH 7.4
DTX18+pHluorine	1.97285	0	pH 7.4
DTX18+pHluorine	2.01599	0	pH 7.4
DTX18+pHluorine	2.12636	0	pH 7.4
pHluorine	2.22932	5	pH 7.4
pHluorine	1.86235	5	pH 7.4
pHluorine	2.00684	5	pH 7.4
pHluorine	1.87427	5	pH 7.4
pHluorine	1.83966	5	pH 7.4
pHluorine	2.14367	5	pH 7.4
pHluorine	1.71153	5	pH 7.4
pHluorine	1.73333	5	pH 7.4
DTX18+pHluorine	2.00036	5	pH 7.4
DTX18+pHluorine	2.02318	5	pH 7.4
DTX18+pHluorine	2.08905	5	pH 7.4
DTX18+pHluorine	1.90999	5	pH 7.4
DTX18+pHluorine	1.94938	5	pH 7.4
DTX18+pHluorine	2.0104	5	pH 7.4
DTX18+pHluorine	1.97923	5	pH 7.4
DTX18+pHluorine	2.07624	5	pH 7.4
pHluorine	2.21679	10	pH 7.4
pHluorine	1.84721	10	pH 7.4
pHluorine	1.91035	10	pH 7.4
pHluorine	1.86872	10	pH 7.4
pHluorine	1.80047	10	pH 7.4
pHluorine	2.09155	10	pH 7.4
pHluorine	1.67132	10	pH 7.4
pHluorine	1.72201	10	pH 7.4
DTX18+pHluorine	1.96253	10	pH 7.4
DTX18+pHluorine	1.97803	10	pH 7.4
DTX18+pHluorine	2.17637	10	pH 7.4
DTX18+pHluorine	1.89226	10	pH 7.4
DTX18+pHluorine	1.93373	10	pH 7.4
DTX18+pHluorine	1.92669	10	pH 7.4
DTX18+pHluorine	1.91932	10	pH 7.4
DTX18+pHluorine	2.06091	10	pH 7.4
pHluorine	2.1626	15	pH 7.4
pHluorine	1.79234	15	pH 7.4
pHluorine	1.90168	15	pH 7.4
pHluorine	1.80384	15	pH 7.4
pHluorine	1.7941	15	pH 7.4
pHluorine	2.03087	15	pH 7.4
pHluorine	1.66608	15	pH 7.4
pHluorine	1.71526	15	pH 7.4
DTX18+pHluorine	1.97758	15	pH 7.4
DTX18+pHluorine	1.95694	15	pH 7.4
DTX18+pHluorine	2.04757	15	pH 7.4
DTX18+pHluorine	1.81444	15	pH 7.4
DTX18+pHluorine	1.93691	15	pH 7.4
DTX18+pHluorine	1.89919	15	pH 7.4
DTX18+pHluorine	1.95676	15	pH 7.4
DTX18+pHluorine	2.05784	15	pH 7.4
pHluorine	0.299457	17	pH 6.5/CCCP
pHluorine	0.264423	17	pH 6.5/CCCP
pHluorine	0.261424	17	pH 6.5/CCCP
pHluorine	0.266633	17	pH 6.5/CCCP
pHluorine	0.26288	17	pH 6.5/CCCP
pHluorine	0.302002	17	pH 6.5/CCCP
pHluorine	0.227792	17	pH 6.5/CCCP
pHluorine	0.235522	17	pH 6.5/CCCP
DTX18+pHluorine	0.263858	17	pH 6.5/CCCP
DTX18+pHluorine	0.289118	17	pH 6.5/CCCP
DTX18+pHluorine	0.301044	17	pH 6.5/CCCP
DTX18+pHluorine	0.251637	17	pH 6.5/CCCP
DTX18+pHluorine	0.254755	17	pH 6.5/CCCP
DTX18+pHluorine	0.255555	17	pH 6.5/CCCP
DTX18+pHluorine	0.258137	17	pH 6.5/CCCP
DTX18+pHluorine	0.27724	17	pH 6.5/CCCP
pHluorine	0.208075	22	pH 6.5/CCCP
pHluorine	0.19449	22	pH 6.5/CCCP
pHluorine	0.188537	22	pH 6.5/CCCP
pHluorine	0.182613	22	pH 6.5/CCCP
pHluorine	0.175521	22	pH 6.5/CCCP
pHluorine	0.213107	22	pH 6.5/CCCP
pHluorine	0.154828	22	pH 6.5/CCCP
pHluorine	0.157993	22	pH 6.5/CCCP
DTX18+pHluorine	0.18174	22	pH 6.5/CCCP
DTX18+pHluorine	0.212385	22	pH 6.5/CCCP
DTX18+pHluorine	0.244591	22	pH 6.5/CCCP
DTX18+pHluorine	0.17634	22	pH 6.5/CCCP
DTX18+pHluorine	0.186743	22	pH 6.5/CCCP
DTX18+pHluorine	0.203628	22	pH 6.5/CCCP
DTX18+pHluorine	0.199972	22	pH 6.5/CCCP
DTX18+pHluorine	0.195123	22	pH 6.5/CCCP
pHluorine	0.158619	27	pH 6.5/CCCP
pHluorine	0.144395	27	pH 6.5/CCCP
pHluorine	0.150092	27	pH 6.5/CCCP
pHluorine	0.144819	27	pH 6.5/CCCP
pHluorine	0.144957	27	pH 6.5/CCCP
pHluorine	0.166931	27	pH 6.5/CCCP
pHluorine	0.121384	27	pH 6.5/CCCP
pHluorine	0.121339	27	pH 6.5/CCCP
DTX18+pHluorine	0.143762	27	pH 6.5/CCCP
DTX18+pHluorine	0.171193	27	pH 6.5/CCCP
DTX18+pHluorine	0.192739	27	pH 6.5/CCCP
DTX18+pHluorine	0.139668	27	pH 6.5/CCCP
DTX18+pHluorine	0.147787	27	pH 6.5/CCCP
DTX18+pHluorine	0.167485	27	pH 6.5/CCCP
DTX18+pHluorine	0.158484	27	pH 6.5/CCCP
DTX18+pHluorine	0.152383	27	pH 6.5/CCCP
pHluorine	0.135704	37	pH 6.5/CCCP
pHluorine	0.118634	37	pH 6.5/CCCP
pHluorine	0.130737	37	pH 6.5/CCCP
pHluorine	0.119987	37	pH 6.5/CCCP
pHluorine	0.120852	37	pH 6.5/CCCP
pHluorine	0.139669	37	pH 6.5/CCCP
pHluorine	0.105427	37	pH 6.5/CCCP
pHluorine	0.104781	37	pH 6.5/CCCP
DTX18+pHluorine	0.121414	37	pH 6.5/CCCP
DTX18+pHluorine	0.14714	37	pH 6.5/CCCP
DTX18+pHluorine	0.168145	37	pH 6.5/CCCP
DTX18+pHluorine	0.11751	37	pH 6.5/CCCP
DTX18+pHluorine	0.118702	37	pH 6.5/CCCP
DTX18+pHluorine	0.132707	37	pH 6.5/CCCP
DTX18+pHluorine	0.132543	37	pH 6.5/CCCP
DTX18+pHluorine	0.133249	37	pH 6.5/CCCP
pHluorine	0.123123	50	pH 6.5/CCCP
pHluorine	0.105216	50	pH 6.5/CCCP
pHluorine	0.115781	50	pH 6.5/CCCP
pHluorine	0.106309	50	pH 6.5/CCCP
pHluorine	0.109481	50	pH 6.5/CCCP
pHluorine	0.128727	50	pH 6.5/CCCP
pHluorine	0.0921015	50	pH 6.5/CCCP
pHluorine	0.0942906	50	pH 6.5/CCCP
DTX18+pHluorine	0.105688	50	pH 6.5/CCCP
DTX18+pHluorine	0.132066	50	pH 6.5/CCCP
DTX18+pHluorine	0.159366	50	pH 6.5/CCCP
DTX18+pHluorine	0.105771	50	pH 6.5/CCCP
DTX18+pHluorine	0.105057	50	pH 6.5/CCCP
DTX18+pHluorine	0.11627	50	pH 6.5/CCCP
DTX18+pHluorine	0.122051	50	pH 6.5/CCCP
DTX18+pHluorine	0.116192	50	pH 6.5/CCCP
pHluorine	0.109156	62	pH 6.5/CCCP
pHluorine	0.0959384	62	pH 6.5/CCCP
pHluorine	0.105822	62	pH 6.5/CCCP
pHluorine	0.0986165	62	pH 6.5/CCCP
pHluorine	0.108201	62	pH 6.5/CCCP
pHluorine	0.126191	62	pH 6.5/CCCP
pHluorine	0.086922	62	pH 6.5/CCCP
pHluorine	0.0874303	62	pH 6.5/CCCP
DTX18+pHluorine	0.0949931	62	pH 6.5/CCCP
DTX18+pHluorine	0.121107	62	pH 6.5/CCCP
DTX18+pHluorine	0.15919	62	pH 6.5/CCCP
DTX18+pHluorine	0.100649	62	pH 6.5/CCCP
DTX18+pHluorine	0.0991047	62	pH 6.5/CCCP
DTX18+pHluorine	0.111237	62	pH 6.5/CCCP
DTX18+pHluorine	0.113964	62	pH 6.5/CCCP
DTX18+pHluorine	0.109215	62	pH 6.5/CCCP
pHluorine	0.104934	65	pH 6.5/CCCP
pHluorine	0.0882469	65	pH 6.5/CCCP
pHluorine	0.105601	65	pH 6.5/CCCP
pHluorine	0.0940132	65	pH 6.5/CCCP
pHluorine	0.108698	65	pH 6.5/CCCP
pHluorine	0.130442	65	pH 6.5/CCCP
pHluorine	0.0872327	65	pH 6.5/CCCP
pHluorine	0.0820554	65	pH 6.5/CCCP
DTX18+pHluorine	0.0934887	65	pH 6.5/CCCP
DTX18+pHluorine	0.116529	65	pH 6.5/CCCP
DTX18+pHluorine	0.161427	65	pH 6.5/CCCP
DTX18+pHluorine	0.100546	65	pH 6.5/CCCP
DTX18+pHluorine	0.100009	65	pH 6.5/CCCP
DTX18+pHluorine	0.105337	65	pH 6.5/CCCP
DTX18+pHluorine	0.116524	65	pH 6.5/CCCP
DTX18+pHluorine	0.107992	65	pH 6.5/CCCP
pHluorine	0.555819	67	pH 9.0/CCCP
pHluorine	0.455981	67	pH 9.0/CCCP
pHluorine	0.520455	67	pH 9.0/CCCP
pHluorine	0.486502	67	pH 9.0/CCCP
pHluorine	0.464603	67	pH 9.0/CCCP
pHluorine	0.526427	67	pH 9.0/CCCP
pHluorine	0.410237	67	pH 9.0/CCCP
pHluorine	0.442123	67	pH 9.0/CCCP
DTX18+pHluorine	0.469819	67	pH 9.0/CCCP
DTX18+pHluorine	0.558219	67	pH 9.0/CCCP
DTX18+pHluorine	0.654339	67	pH 9.0/CCCP
DTX18+pHluorine	0.494408	67	pH 9.0/CCCP
DTX18+pHluorine	0.467675	67	pH 9.0/CCCP
DTX18+pHluorine	0.527953	67	pH 9.0/CCCP
DTX18+pHluorine	0.538344	67	pH 9.0/CCCP
DTX18+pHluorine	0.533384	67	pH 9.0/CCCP
pHluorine	0.657181	72	pH 9.0/CCCP
pHluorine	0.590274	72	pH 9.0/CCCP
pHluorine	0.647458	72	pH 9.0/CCCP
pHluorine	0.603795	72	pH 9.0/CCCP
pHluorine	0.59323	72	pH 9.0/CCCP
pHluorine	0.657033	72	pH 9.0/CCCP
pHluorine	0.53188	72	pH 9.0/CCCP
pHluorine	0.581476	72	pH 9.0/CCCP
DTX18+pHluorine	0.607489	72	pH 9.0/CCCP
DTX18+pHluorine	0.631925	72	pH 9.0/CCCP
DTX18+pHluorine	0.73397	72	pH 9.0/CCCP
DTX18+pHluorine	0.566577	72	pH 9.0/CCCP
DTX18+pHluorine	0.53646	72	pH 9.0/CCCP
DTX18+pHluorine	0.601554	72	pH 9.0/CCCP
DTX18+pHluorine	0.612405	72	pH 9.0/CCCP
DTX18+pHluorine	0.62576	72	pH 9.0/CCCP
pHluorine	0.744712	77	pH 9.0/CCCP
pHluorine	0.594483	77	pH 9.0/CCCP
pHluorine	0.676074	77	pH 9.0/CCCP
pHluorine	0.643976	77	pH 9.0/CCCP
pHluorine	0.654587	77	pH 9.0/CCCP
pHluorine	0.72219	77	pH 9.0/CCCP
pHluorine	0.594978	77	pH 9.0/CCCP
pHluorine	0.614751	77	pH 9.0/CCCP
DTX18+pHluorine	0.659356	77	pH 9.0/CCCP
DTX18+pHluorine	0.669502	77	pH 9.0/CCCP
DTX18+pHluorine	0.75612	77	pH 9.0/CCCP
DTX18+pHluorine	0.608992	77	pH 9.0/CCCP
DTX18+pHluorine	0.579274	77	pH 9.0/CCCP
DTX18+pHluorine	0.63077	77	pH 9.0/CCCP
DTX18+pHluorine	0.650791	77	pH 9.0/CCCP
DTX18+pHluorine	0.663372	77	pH 9.0/CCCP
pHluorine	0.769643	82	pH 9.0/CCCP
pHluorine	0.644984	82	pH 9.0/CCCP
pHluorine	0.715169	82	pH 9.0/CCCP
pHluorine	0.680531	82	pH 9.0/CCCP
pHluorine	0.677143	82	pH 9.0/CCCP
pHluorine	0.753445	82	pH 9.0/CCCP
pHluorine	0.595199	82	pH 9.0/CCCP
pHluorine	0.650277	82	pH 9.0/CCCP
DTX18+pHluorine	0.6761	82	pH 9.0/CCCP
DTX18+pHluorine	0.710019	82	pH 9.0/CCCP
DTX18+pHluorine	0.787991	82	pH 9.0/CCCP
DTX18+pHluorine	0.63073	82	pH 9.0/CCCP
DTX18+pHluorine	0.597954	82	pH 9.0/CCCP
DTX18+pHluorine	0.651788	82	pH 9.0/CCCP
DTX18+pHluorine	0.671881	82	pH 9.0/CCCP
DTX18+pHluorine	0.680302	82	pH 9.0/CCCP
pHluorine	0.812631	87	pH 9.0/CCCP
pHluorine	0.666462	87	pH 9.0/CCCP
pHluorine	0.736621	87	pH 9.0/CCCP
pHluorine	0.69749	87	pH 9.0/CCCP
pHluorine	0.704496	87	pH 9.0/CCCP
pHluorine	0.757496	87	pH 9.0/CCCP
pHluorine	0.614531	87	pH 9.0/CCCP
pHluorine	0.673254	87	pH 9.0/CCCP
DTX18+pHluorine	0.717877	87	pH 9.0/CCCP
DTX18+pHluorine	0.702612	87	pH 9.0/CCCP
DTX18+pHluorine	0.806555	87	pH 9.0/CCCP
DTX18+pHluorine	0.634005	87	pH 9.0/CCCP
DTX18+pHluorine	0.597281	87	pH 9.0/CCCP
DTX18+pHluorine	0.676252	87	pH 9.0/CCCP
DTX18+pHluorine	0.700968	87	pH 9.0/CCCP
DTX18+pHluorine	0.685498	87	pH 9.0/CCCP
pHluorine	0.819788	92	pH 9.0/CCCP
pHluorine	0.688513	92	pH 9.0/CCCP
pHluorine	0.7505	92	pH 9.0/CCCP
pHluorine	0.703928	92	pH 9.0/CCCP
pHluorine	0.724707	92	pH 9.0/CCCP
pHluorine	0.773529	92	pH 9.0/CCCP
pHluorine	0.642723	92	pH 9.0/CCCP
pHluorine	0.685406	92	pH 9.0/CCCP
DTX18+pHluorine	0.722114	92	pH 9.0/CCCP
DTX18+pHluorine	0.732245	92	pH 9.0/CCCP
DTX18+pHluorine	0.879252	92	pH 9.0/CCCP
DTX18+pHluorine	0.671569	92	pH 9.0/CCCP
DTX18+pHluorine	0.617233	92	pH 9.0/CCCP
DTX18+pHluorine	0.700641	92	pH 9.0/CCCP
DTX18+pHluorine	0.68268	92	pH 9.0/CCCP
DTX18+pHluorine	0.704264	92	pH 9.0/CCCP
pHluorine	0.820774	97	pH 9.0/CCCP
pHluorine	0.698504	97	pH 9.0/CCCP
pHluorine	0.762543	97	pH 9.0/CCCP
pHluorine	0.710799	97	pH 9.0/CCCP
pHluorine	0.735725	97	pH 9.0/CCCP
pHluorine	0.782605	97	pH 9.0/CCCP
pHluorine	0.66909	97	pH 9.0/CCCP
pHluorine	0.723601	97	pH 9.0/CCCP
DTX18+pHluorine	0.743569	97	pH 9.0/CCCP
DTX18+pHluorine	0.723074	97	pH 9.0/CCCP
DTX18+pHluorine	0.844123	97	pH 9.0/CCCP
DTX18+pHluorine	0.681108	97	pH 9.0/CCCP
DTX18+pHluorine	0.635574	97	pH 9.0/CCCP
DTX18+pHluorine	0.699949	97	pH 9.0/CCCP
DTX18+pHluorine	0.707339	97	pH 9.0/CCCP
DTX18+pHluorine	0.685939	97	pH 9.0/CCCP
pHluorine	0.860347	102	pH 9.0/CCCP
pHluorine	0.716772	102	pH 9.0/CCCP
pHluorine	0.786423	102	pH 9.0/CCCP
pHluorine	0.705426	102	pH 9.0/CCCP
pHluorine	0.755128	102	pH 9.0/CCCP
pHluorine	0.785485	102	pH 9.0/CCCP
pHluorine	0.679147	102	pH 9.0/CCCP
pHluorine	0.721034	102	pH 9.0/CCCP
DTX18+pHluorine	0.742279	102	pH 9.0/CCCP
DTX18+pHluorine	0.725994	102	pH 9.0/CCCP
DTX18+pHluorine	0.813368	102	pH 9.0/CCCP
DTX18+pHluorine	0.684587	102	pH 9.0/CCCP
DTX18+pHluorine	0.644308	102	pH 9.0/CCCP
DTX18+pHluorine	0.719215	102	pH 9.0/CCCP
DTX18+pHluorine	0.721853	102	pH 9.0/CCCP
DTX18+pHluorine	0.716764	102	pH 9.0/CCCP

## Sheet: Figure 3b
Sample type	RNA	pH	Concentration_CouAgm
Oocyte	DTX18	pH 5.0	0.309518
Oocyte	DTX18	pH 5.0	0.303852
Oocyte	DTX18	pH 5.0	0.14349
Oocyte	DTX18	pH 5.0	0.118861
Oocyte	DTX18	pH 5.0	0.1484
Oocyte	DTX18	pH 7.4	33.5014
Oocyte	DTX18	pH 7.4	39.9311
Oocyte	DTX18	pH 7.4	39.2092
Oocyte	DTX18	pH 7.4	27.3624
Oocyte	DTX18	pH 7.4	33.6306
Oocyte	DTX18	pH 7.4	45.9014
Oocyte	DTX18	pH 7.4/CCCP	41.4583
Oocyte	DTX18	pH 7.4/CCCP	47.6121
Oocyte	DTX18	pH 7.4/CCCP	48.7528
Oocyte	DTX18	pH 7.4/CCCP	44.8023
Oocyte	DTX18	pH 7.4/CCCP	68.5963
Oocyte	DTX18	pH 7.4/CCCP	52.1097
Oocyte	DTX18	pH 7.4/CCCP	46.1298
Oocyte	DTX18	pH 7.4/CCCP	68.1334
Oocyte	DTX18	pH 9.0	82.6517
Oocyte	DTX18	pH 9.0	88.8452
Oocyte	DTX18	pH 9.0	71.6462
Oocyte	DTX18	pH 9.0	49.7323
Oocyte	DTX18	pH 9.0	39.7475
Oocyte	DTX18	pH 9.0	65.2213
Oocyte	DTX18	pH 9.0	67.3543
Oocyte	DTX18	pH 9.0	65.6162
Oocyte	DTX18	pH 9.0/CCCP	128.829
Oocyte	DTX18	pH 9.0/CCCP	100.974
Oocyte	DTX18	pH 9.0/CCCP	112.92
Oocyte	DTX18	pH 9.0/CCCP	126.764
Oocyte	DTX18	pH 9.0/CCCP	146.392
Oocyte	Mock	pH 5.0	0
Oocyte	Mock	pH 5.0	0
Oocyte	Mock	pH 5.0	0
Oocyte	Mock	pH 5.0	0
Oocyte	Mock	pH 5.0	0
Oocyte	Mock	pH 5.0	0
Oocyte	Mock	pH 5.0	0
Oocyte	Mock	pH 5.0	0
Oocyte	Mock	pH 7.4	0
Oocyte	Mock	pH 7.4	0
Oocyte	Mock	pH 7.4	0
Oocyte	Mock	pH 7.4	0
Oocyte	Mock	pH 7.4	0
Oocyte	Mock	pH 7.4	0
Oocyte	Mock	pH 7.4	0
Oocyte	Mock	pH 7.4	0
Oocyte	Mock	pH 7.4/CCCP	0
Oocyte	Mock	pH 7.4/CCCP	0
Oocyte	Mock	pH 7.4/CCCP	0
Oocyte	Mock	pH 7.4/CCCP	0
Oocyte	Mock	pH 7.4/CCCP	0
Oocyte	Mock	pH 7.4/CCCP	0
Oocyte	Mock	pH 7.4/CCCP	0
Oocyte	Mock	pH 9.0	0
Oocyte	Mock	pH 9.0	0
Oocyte	Mock	pH 9.0	0
Oocyte	Mock	pH 9.0	0
Oocyte	Mock	pH 9.0	0
Oocyte	Mock	pH 9.0	0
Oocyte	Mock	pH 9.0	0
Oocyte	Mock	pH 9.0	0
Oocyte	Mock	pH 9.0/CCCP	0.214529
Oocyte	Mock	pH 9.0/CCCP	0.0928478
Oocyte	Mock	pH 9.0/CCCP	0.129287
Oocyte	Mock	pH 9.0/CCCP	0.136363
Oocyte	Mock	pH 9.0/CCCP	0.0951394
